# Supplementary material for: Use of a diabetes-specific nutritional shake to replace a daily breakfast and afternoon snack improves glycemic responses assessed by continuous glucose monitoring in people with type 2 diabetes: a randomized clinical pilot study
Source: PubMed Central journal article supplement — BMJ Open Diabetes Res Care. 2020 Jul 27;8(1):e001258. doi: 10.1136/bmjdrc-2020-001258 (PMC7389484; doi:10.1136/bmjdrc-2020-001258), 2020-07-27
Supplement: bmjdrc-2020-001258supp001.pdf [file bmjdrc-2020-001258supp001.pdf]

Supplemental Table. Nutrition information of the DSNS used in the study

|                        | Amount per serving | % Daily Value* |
|------------------------|--------------------|----------------|
| Serving size:          | 10 fl oz           |                |
| Calories:              | 180                |                |
| Total Fat, g           | 8                  | 10%            |
| Saturated Fat, g       | 1.5                | 7%             |
| Trans Fat, g           | 0                  |                |
| Polyunsaturated Fat, g | 2.5                |                |
| Monounsaturated Fat, g | 4                  |                |
| Cholesterol, mg        | 10                 | 3%             |
| Total Carbohydrate, g  | 16                 | 6%             |
| Dietary Fiber, g       | 5                  | 17%            |
| Protein, g             | 15                 | 30%            |
